# Supplementary material for: A novel amplification gene PCI domain containing 2 (PCID2) promotes colorectal cancer through directly degrading a tumor suppressor promyelocytic leukemia (PML)
Source: PubMed Central journal article supplement (PMC8660639; doi:10.1038/s41388-021-01941-z), 2021-10-08
Supplement: 41388_2021_1941_MOESM5_ESM.pdf [file 41388_2021_1941_MOESM5_ESM.pdf]

**Supplementary Fig. 4:** Regulated downstream targets of PCID2 identified by Cancer Pathway PCR Array.

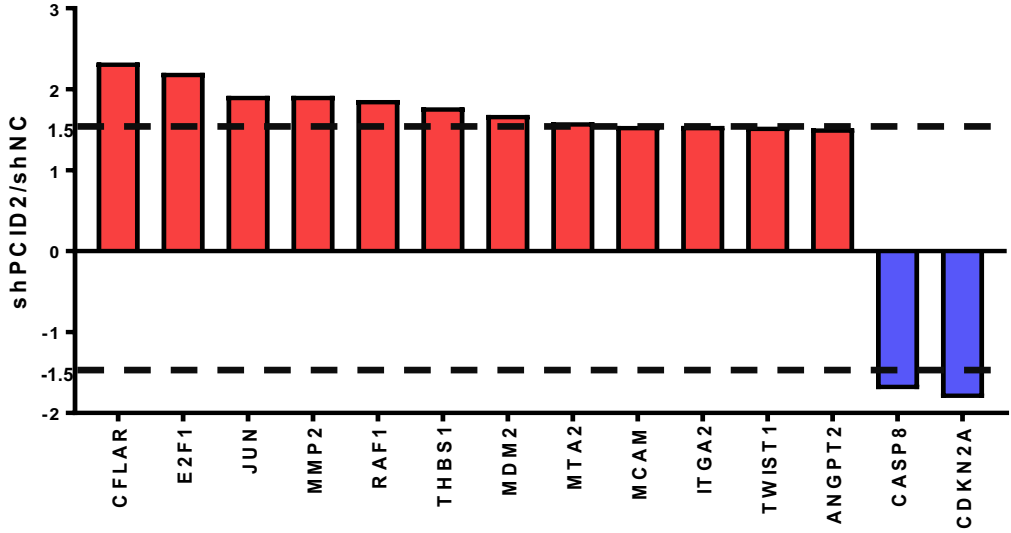

Cell cycle: **E2F1**, **MDM2**, **CDKN2A**  
Apoptosis: **CFLAR**, **CASP8**  
Adhesion: **ITG2A**, **MCAM**, **THBS1**  
Angiogenesis: **ANGPT2**  
Migration/Invasion: **MMP2**, **MTA2**, **TWIST1**  
Other oncogene: **JUN**, **RAF1**
