# Supplementary material for: A novel amplification gene PCI domain containing 2 (PCID2) promotes colorectal cancer through directly degrading a tumor suppressor promyelocytic leukemia (PML)
Source: PubMed Central journal article supplement (PMC8660639; doi:10.1038/s41388-021-01941-z), 2021-10-08

**Supplementary Fig. 5:** **A** PCID2-overexpressed DLD1 cells and PCID2-depleted HCT116 cells promoted and inhibited tumor volume in nude mice respectively. **B** PCID2 expression in mice tumors were confirmed at mRNA and protein levels.

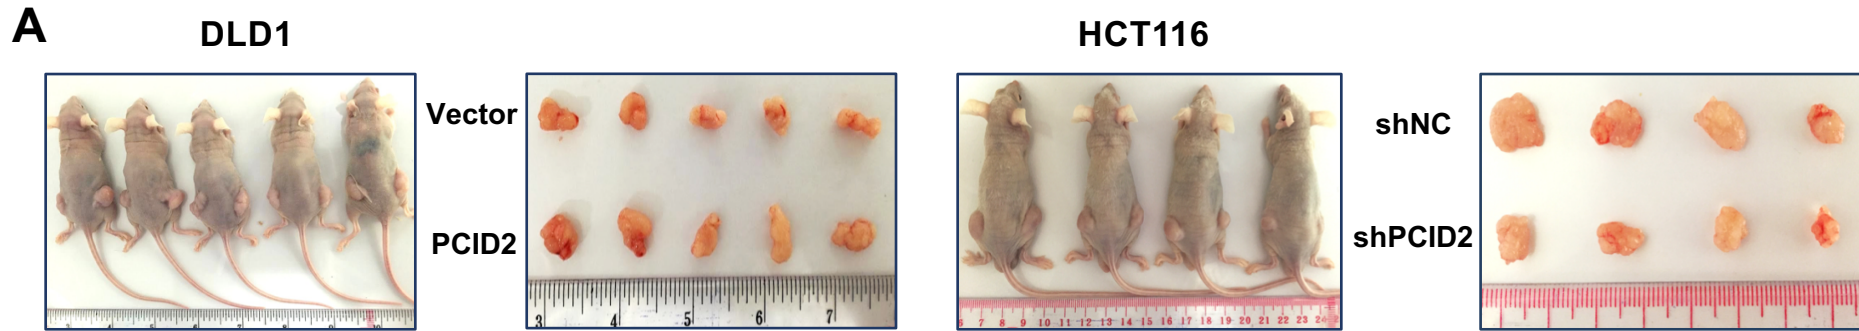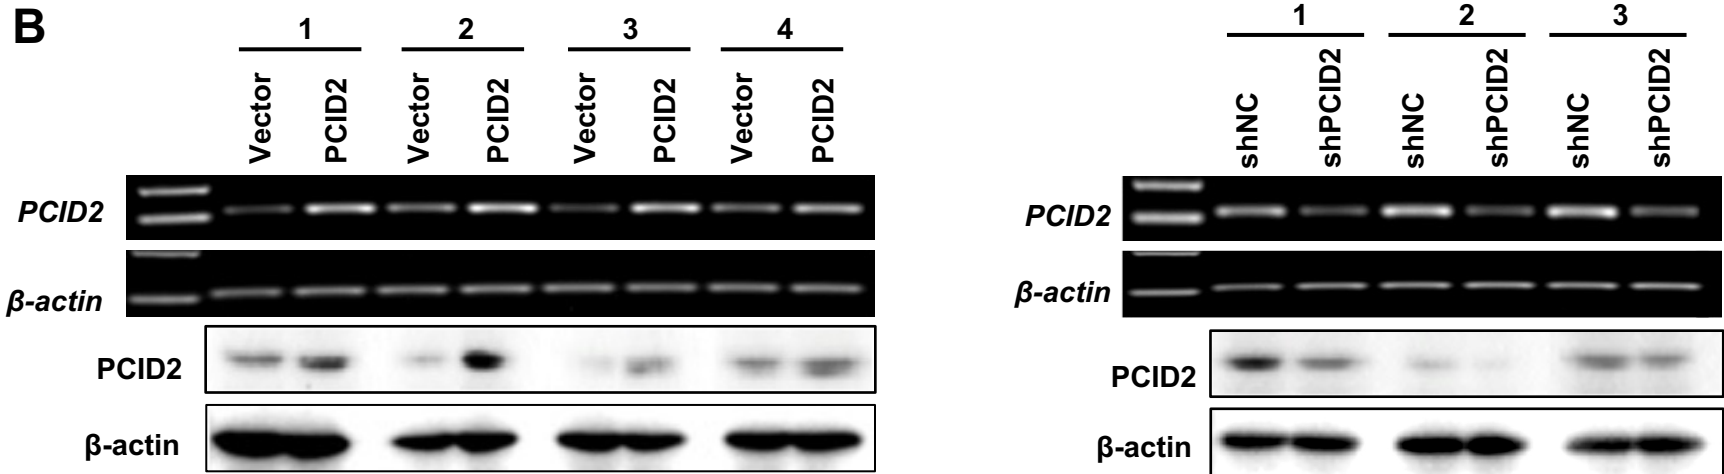

Supplement: 41388_2021_1941_MOESM6_ESM.pdf [file 41388_2021_1941_MOESM6_ESM.pdf]
