# Supplementary material for: A novel amplification gene PCI domain containing 2 (PCID2) promotes colorectal cancer through directly degrading a tumor suppressor promyelocytic leukemia (PML)
Source: PubMed Central journal article supplement (PMC8660639; doi:10.1038/s41388-021-01941-z), 2021-10-08

**Supplementary Fig. 7:** Recurrence curves showed that the patients with CRC with low PML expression had increased risk of recurrence compared with those with high PCID2 ( $P < 0.05$  for TCGA cohort, log-rank test). log-rank test.

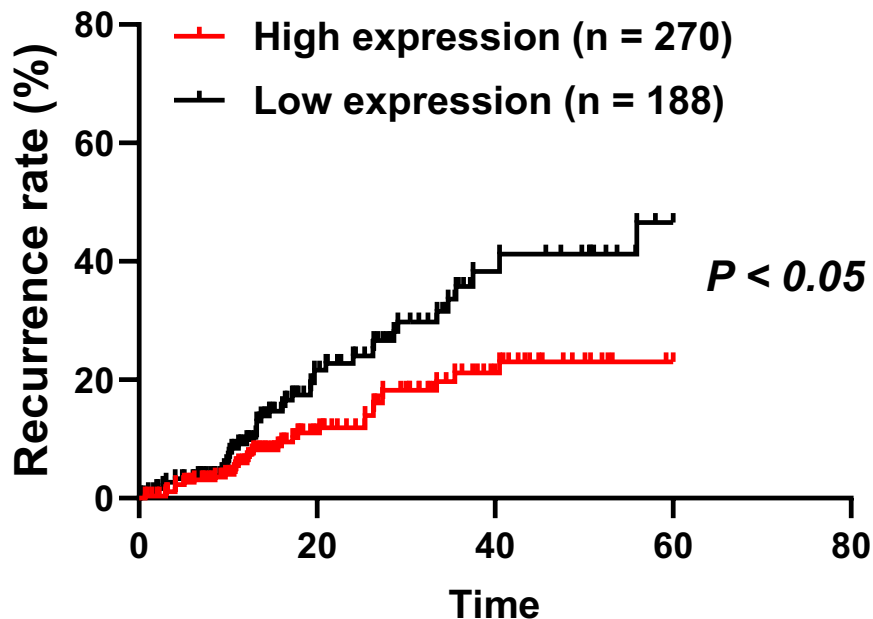

Supplement: 41388_2021_1941_MOESM8_ESM.pdf [file 41388_2021_1941_MOESM8_ESM.pdf]
